# Supplementary material for: New construction method of Bi2MoO6/kaolinite with efficient visible photocatalytic activity
Source: Royal Society of Chemistry journal article supplement (doi:10.1039/d3nj02122j), 2023-01-01
Supplement: d3nj02122j1.pdf [file d3nj02122j1.pdf]

Electronic Supplementary Material for New Journal of Chemistry.

## **New construction method of Bi<sub>2</sub>MoO<sub>6</sub>/kaolinite with efficient visible photocatalytic activity**

Guangxin Zhang\*, Shilin Li, Yifei Li

*School of Materials Science and Engineering, Shandong University of Science and Technology,*

*Qingdao 266590, PR China*

### *1. Materials*

The kaolinite was obtained from Jingdezhen (Jiangxi, China). Ammonium hydroxide (NH<sub>3</sub>·H<sub>2</sub>O) was obtained from Guangfu Fine Chemical Research Institute (Tianjin, China). Bismuth nitrate pentahydrate (Bi(NO<sub>3</sub>)<sub>3</sub>·5H<sub>2</sub>O) was provided by Maya Reagent (Zhejiang, China). Sodium molybdate dihydrate (Na<sub>2</sub>MoO<sub>4</sub>·2H<sub>2</sub>O) was purchased from Macklin Reagent Co., Ltd (Shanghai, China). Deionized water was used during the entire experiment.

### *2. Characterization*

Rigaku Ultima IV X-ray powder diffractometer with Cu K $\alpha$  radiation was employed to test the phase of samples. The microscopic photographs of samples were obtained from TESCAN MIRA LMS field emission scanning electron microscope. Thermo Scientific K-Alpha X-ray photoelectron spectrometer with Al K $\alpha$  radiation was applied to obtain the XPS spectra of samples. The results were calibrated by C 1s (284.8 eV). Thermo Scientific Nicolet iS20 was used to collect the Fourier transform infrared spectroscopy using KBr as background (resolution: 4 cm<sup>-1</sup>, scanning number: 32). The BET surface area and pore distribution were tested by Micromeritics ASAP 2460. TA-Q600 was used to obtain the TG-DSC results (heating rate of 10 °C/min). The UV-vis diffuse reflectance spectra of samples were collected by UH4150 spectrophotometer (Hitachi). The Bruker EMX PLUS electron paramagnetic resonance spectrometer was used to test the generated free radicals in photocatalysis.

### *3. Photocatalytic properties test*

tetracycline hydrochloride (TC) and rhodamine B (RhB) solution were used as the target pollutants in the experiment. CFLHXF300 xenon lamp (>400 nm) produced by Education Au-Light of China was used as the visible light source. Prior to photocatalytic test, 100 mg of samples was dispersed in 40 mg/L TC (or 10 mg/L RhB) solution. After 30 min of agitation, the light was turned on, and the solution was extracted at time intervals. After filtration through a 0.45  $\mu$ m filter membrane, the absorbance of solution was measured at 357 nm for TC and 554 nm for RhB to analyze the photocatalytic performance by Cary 60 UV-Vis spectrophotometer (Agilent).

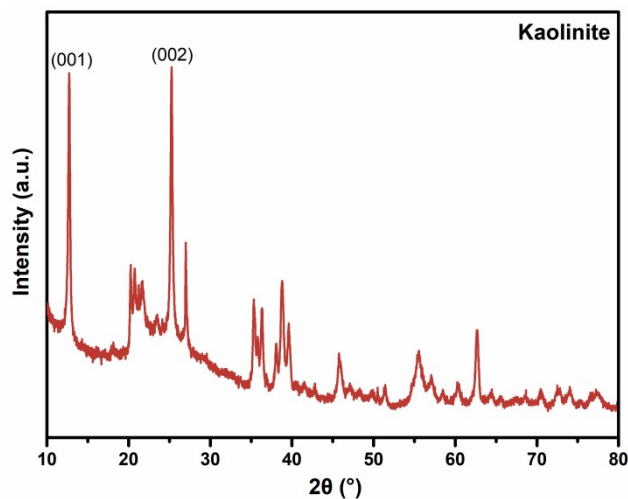

Fig. S1. XRD pattern of kaolinite.

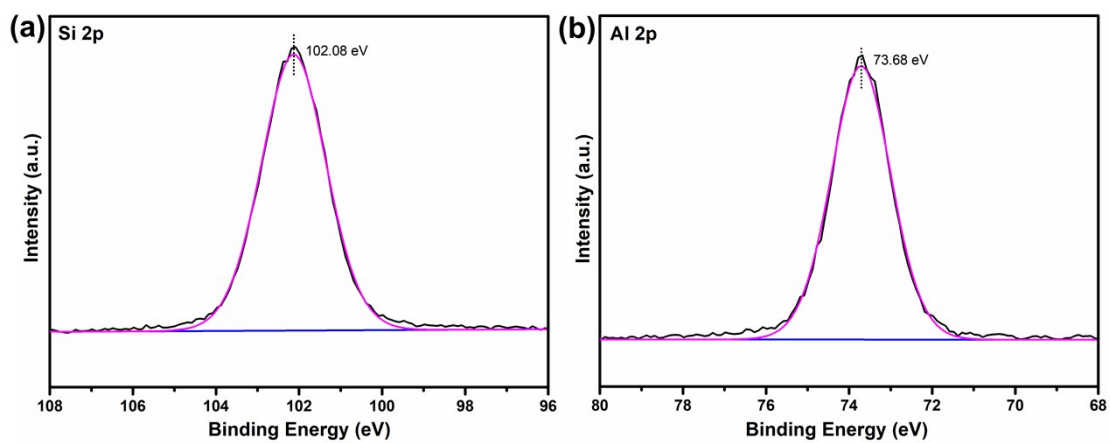

Fig. S2. XPS spectra of kaolinite (a) Si 2p, (b) Al 2p.

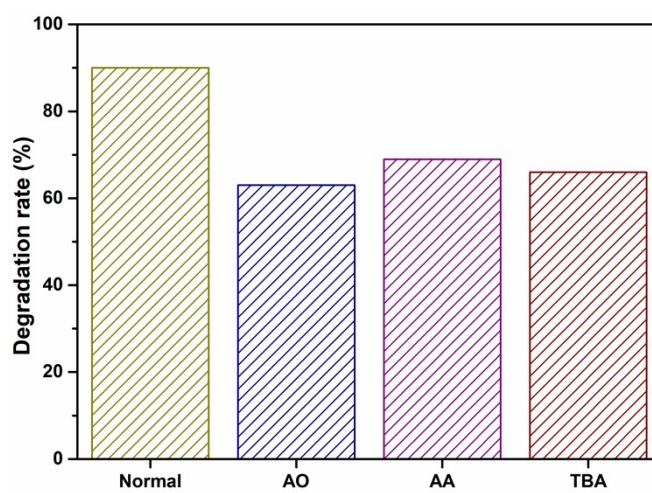

Fig. S3. Free radical quenching experiments of  $\text{Bi}_2\text{MoO}_6/\text{kaolinite}$  for RhB degradation.

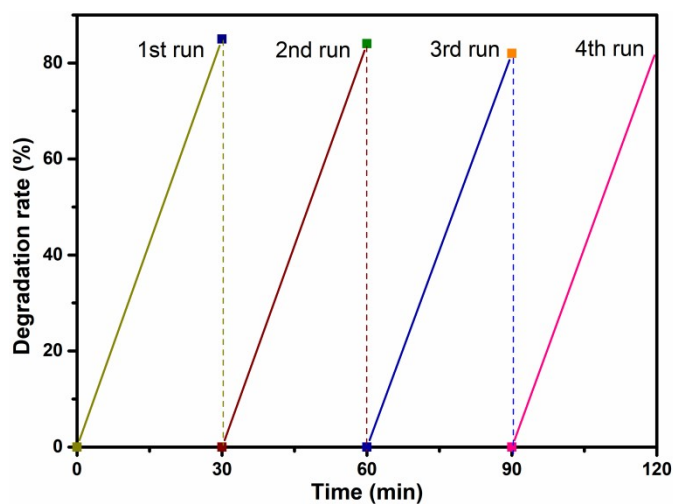

Fig. S4. Cycling test of  $\text{Bi}_2\text{MoO}_6/\text{kaolinite}$  for RhB degradation.

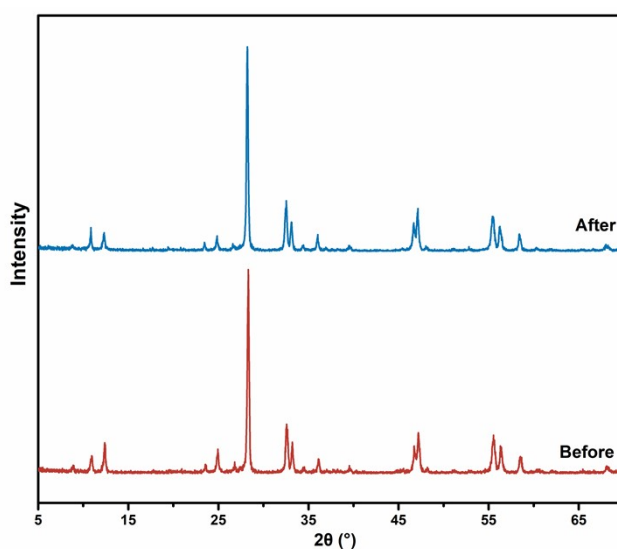

Fig. S5. XRD patterns of  $\text{Bi}_2\text{MoO}_6/\text{kaolinite}$  before and after photocatalysis.

Table S1 Comparison of photocatalytic performance of  $\text{Bi}_2\text{MoO}_6$ -based photocatalysts.

| Photocatalysts                            | Preparation method     | Light source                        | Dosage  | Initial concentration | Degradation efficiency | Reference |
|-------------------------------------------|------------------------|-------------------------------------|---------|-----------------------|------------------------|-----------|
| $\text{BiOCl-Bi}_2\text{MoO}_6$           | solvothermal method    | 350 W Xe lamp ( $\lambda > 420$ nm) | 1 g/L   | 10 mg/L TC            | 97% (100 min)          | [1]       |
| $\text{Ni(OH)}_2/\text{Bi}_2\text{MoO}_6$ | solvent-thermal method | 300 W Xe lamp ( $\lambda > 420$ nm) | 0.4 g/L | 10 mg/L RhB           | 98% (135 min)          | [2]       |
| $\text{In(OH)}_3/\text{Bi}_2\text{MoO}_6$ | solvothermal method    | 500 W Xe lamp ( $\lambda > 420$ nm) | 1 g/L   | 10 mg/L RhB           | 86% (200 min)          | [3]       |

|                                                                    |                               |                                     |          |                           |                              |           |
|--------------------------------------------------------------------|-------------------------------|-------------------------------------|----------|---------------------------|------------------------------|-----------|
| MoS <sub>2</sub> /CdS/Bi <sub>2</sub> MoO <sub>6</sub>             | solvothermal method           | 300 W Xe lamp ( $\lambda > 420$ nm) | 0.6 g/L  | 10 mg/L RhB               | 71% (120 min)                | [4]       |
| Pt/Bi <sub>2</sub> MoO <sub>6</sub>                                | solvothermal method           | Xe lamp ( $\lambda > 420$ nm)       | 1 g/L    | $\approx 4.8$ mg/L RhB    | 99% (120 min)                | [5]       |
| FeIn <sub>2</sub> S <sub>4</sub> /Bi <sub>2</sub> MoO <sub>6</sub> | solvothermal method           | Xe lamp ( $\lambda > 420$ nm)       | 1 g/L    | 20 mg/L TC                | 83% (35 min)                 | [6]       |
| Bi <sub>2</sub> MoO <sub>6</sub> /(Zn/Ti)LDH                       | solvothermal method           | 500 W Xe lamp ( $\lambda > 400$ nm) | 1 g/L    | 10 mg/L RhB               | 100% (60 min)                | [7]       |
| Bi <sub>2</sub> MoO <sub>6</sub> @Bi <sub>2</sub> O <sub>3</sub>   | solvothermal method           | 5 W LED                             | 0.25 g/L | 10 mg/L TC                | 96% (180 min)                | [8]       |
| Bi <sub>2</sub> MoO <sub>6</sub> /kaolinite                        | precipitation-calcined method | 300 W Xe lamp ( $\lambda > 400$ nm) | 1 g/L    | 10 mg/L RhB<br>40 mg/L TC | 90% (30 min)<br>75% (50 min) | This work |

## Reference

- [1] Y. Qiu, J. Lu, Y. Yan, et al. Bismuth molybdate photocatalyst for the efficient photocatalytic degradation of tetracycline in water under visible-light irradiation, *Surf. Interfaces*, 2022, 31, 102009.
- [2] Y. Mao, B. Qiu, M. Zhang, et al. Bismuth molybdate heterojunction composited by nickel hydroxide ultrafine nanosheet with high photodecomposition efficiency, *Solar Energy*, 2020, 207, 832-840.
- [3] T. Hu, H. Li, Z. Liang, et al. Facile synthesis of indium hydroxide nanosheet/bismuth molybdate hierarchical microsphere heterojunction with enhanced photocatalytic performance, *J. Colloid Interf. Sci.* 2019, 545, 301-310.
- [4] Z. Wang, J. Li, S. Fu, et al. Construction of MoS<sub>2</sub>/CdS/Bi<sub>2</sub>MoO<sub>6</sub> Z-scheme photocatalyst for efficient photocatalytic degradation under visible-light, *J. Solid State Chem.* 2023, 322, 123957.
- [5] S. Pinchujit, A. Phuruangrat, S. Wannapop, et al. Sonochemical-assisted synthesis of Pt/Bi<sub>2</sub>MoO<sub>6</sub> nanocomposites for efficient photodegradation of rhodamine B, *Opt. Mater.* 2023, 135, 113265.
- [6] H. Wei, F. Meng, J. Li, et al. FeIn<sub>2</sub>S<sub>4</sub>/Bi<sub>2</sub>MoO<sub>6</sub> Z-scheme heterostructural composites efficiently degrade tetracycline hydrochloride under visible light, *Appl. Surf. Sci.* 2023, 611, 155642.
- [7] X. Yang, L. Wu, R. Hu, et al. Hollow microspherical Bi<sub>2</sub>MoO<sub>6</sub>/Zn-Ti layered double hydroxide heterojunction for efficient visible-light photocatalytic degradation of organic contaminants, *New J. Chem.*, 2022, 46, 1704-1712.
- [8] L. Zhang, Q. Shen, R. Zhan, et al. Oxygen-vacancy-mediated photocatalytic degradation of tetracycline under weak visiblelight irradiation over hierarchical Bi<sub>2</sub>MoO<sub>6</sub>@Bi<sub>2</sub>O<sub>3</sub> core-shell fibers, *Catal. Sci. Technol.*, 2022, 12, 1685-1696.
